# Supplementary material
Source: Springer Nature journal article supplement (https://www.springermedizin.de/resource/supplementary/12889_2014_6989_MOESM7_ESM.pdf/9499522)

Table 2. Summary of the results of the satisfaction survey on the use and acceptance of long lasting insecticidal screens on doors and windows for dengue prevention in Acapulco, Guerrero, Mexico.

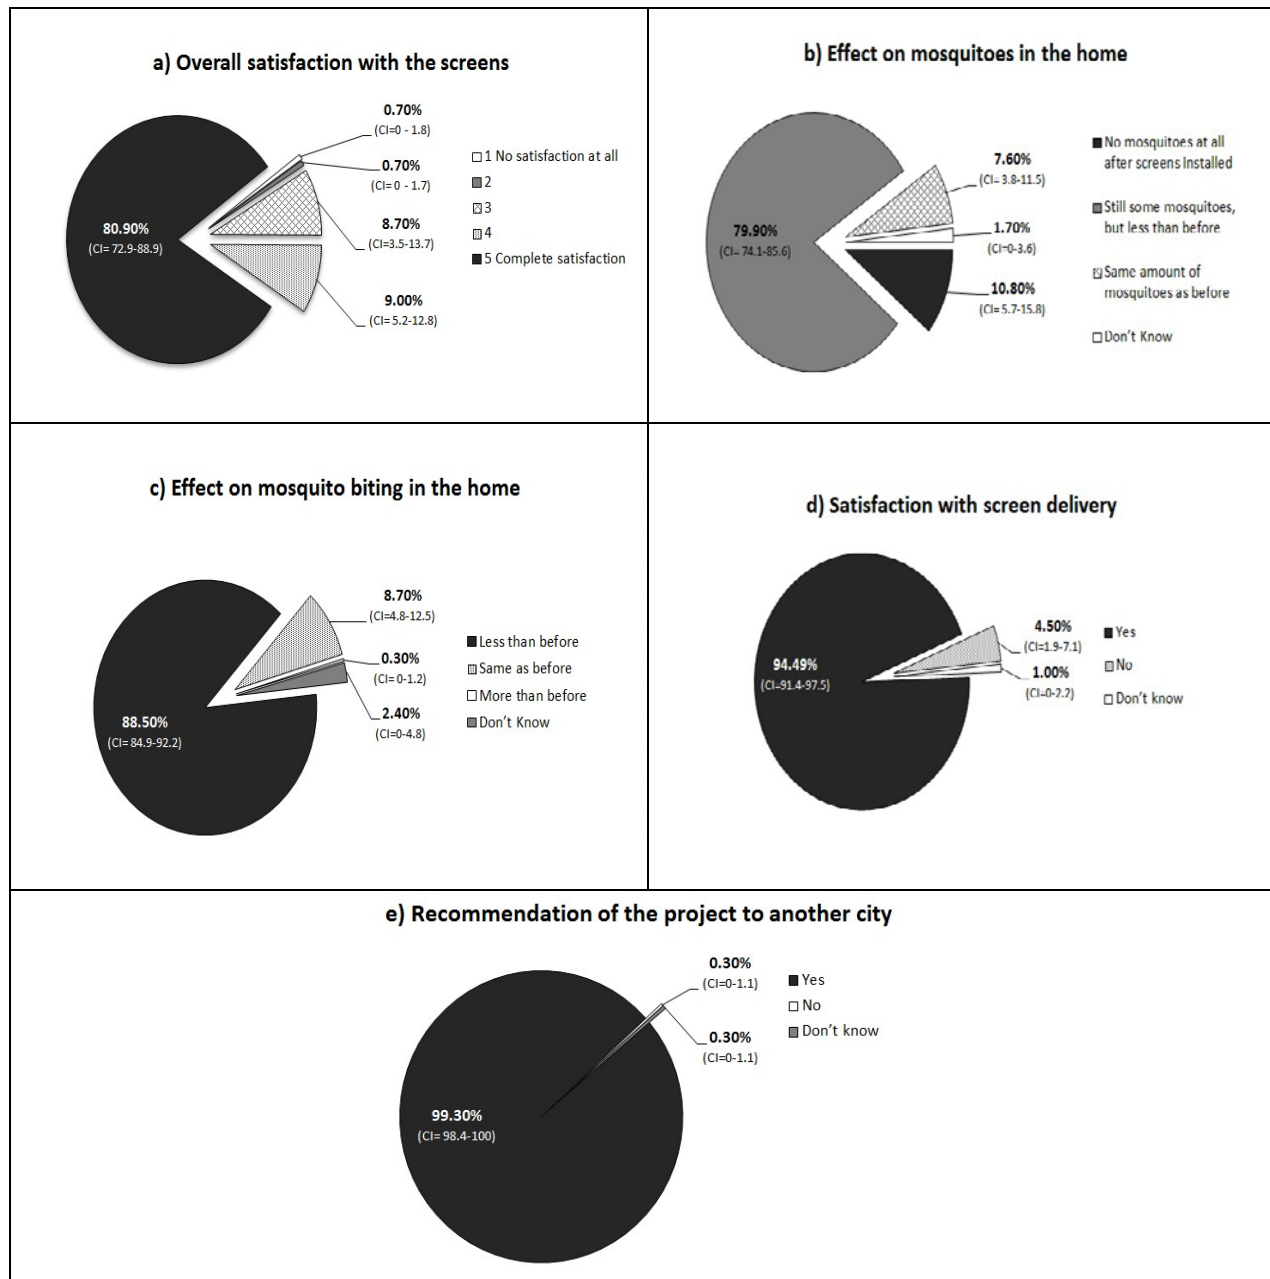

Supplement: MOESM7 [file 9499522]
